# Supplementary material for: Tempora: Cell trajectory inference using time-series single-cell RNA sequencing data
Source: PLOS journal article supplement (doi:10.1371/journal.pcbi.1008205), 2020-09-09
Supplement: S4 (10.1371/journal.pcbi.1008205.s004) [file journal.pcbi.1008205.s004]

Cluster average gene expression correlation

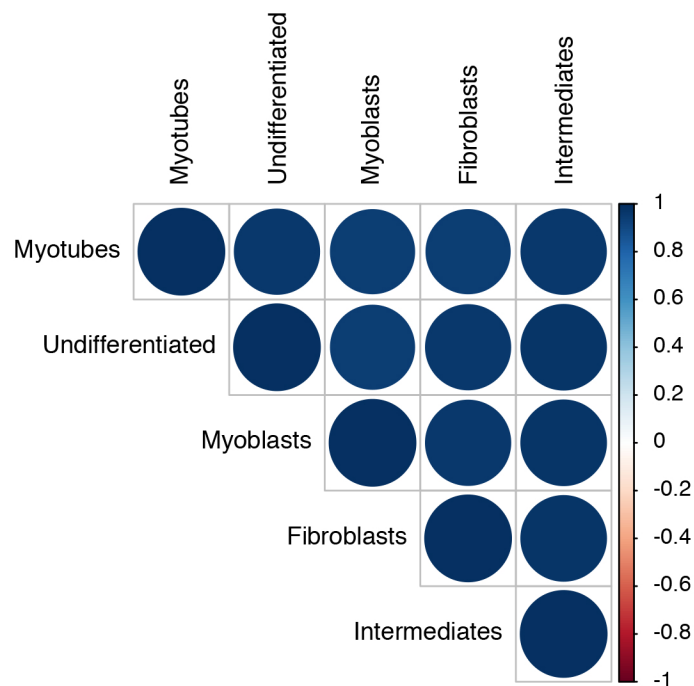

Cluster average pathway enrichment correlation

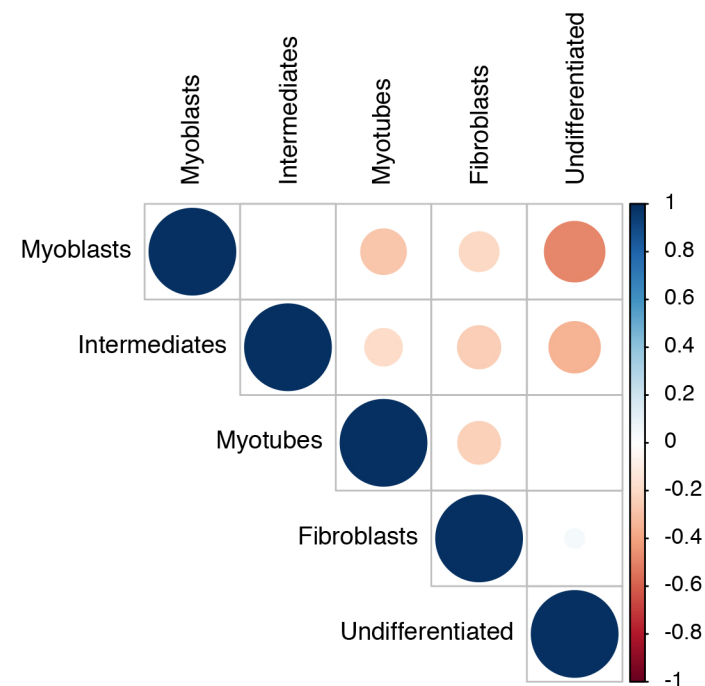

a. HSMM data

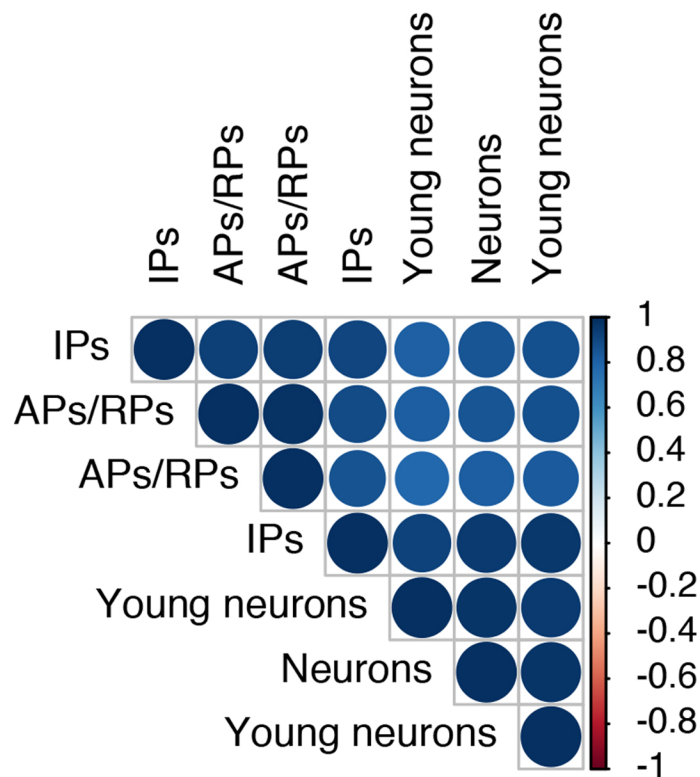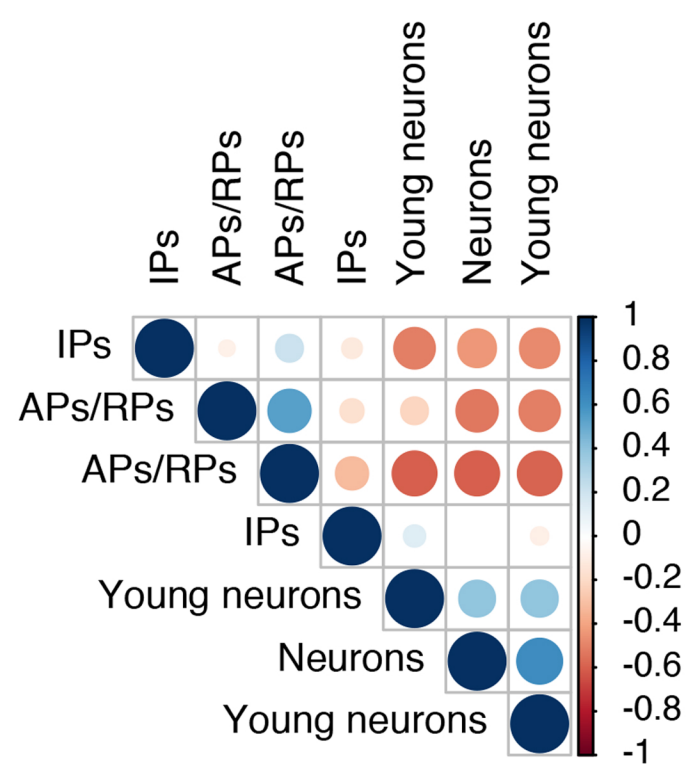

b. Murine cortex data
